# Supplementary material for: A self-powered photoactive room temperature gas sensor based on a porphyrin-functionalized ZnO nanorod/p-Si heterostructure
Source: Royal Society of Chemistry journal article supplement (doi:10.1039/d4tc00927d), 2024-01-01
Supplement: d4tc00927d1.pdf [file d4tc00927d1.pdf]

## Supporting Information

### **A Self-Powered Photoactive Room Temperature Gas sensors based on Porphyrins functionalized ZnO Nanorods/p-Si heterostructure**

Arbacheena Bora<sup>1,2</sup>, Jeena George<sup>1</sup>, Yuvaraj Sivalingam<sup>1,5\*</sup>, Velappa Jayaraman Surya<sup>1,3</sup>, Gabriele Magna<sup>4</sup>, S.R.N. Kiran Mangalampalli<sup>1</sup>, Roberto Paolesse<sup>4</sup>, Corrado Di Natale<sup>2\*</sup>

<sup>1</sup>Department of Physics and Nanotechnology, SRM Institute of Science and Technology, Kattankulathur, Tamil Nadu 603203, India

<sup>2</sup>Department of Electronics Engineering, University of Rome Tor Vergata, Via del Politecnico 1, 00133, Roma, Italy

<sup>3</sup>Department of Chemical Science and Technologies, University of Rome Tor Vergata. Via della Ricerca Scientifica, 00133 Roma, Italy

**Email:** [yuvarajs2@srmist.edu.in](mailto:yuvarajs2@srmist.edu.in), [dinatale@uniroma2.it](mailto:dinatale@uniroma2.it)

# 1. Morphological Analysis

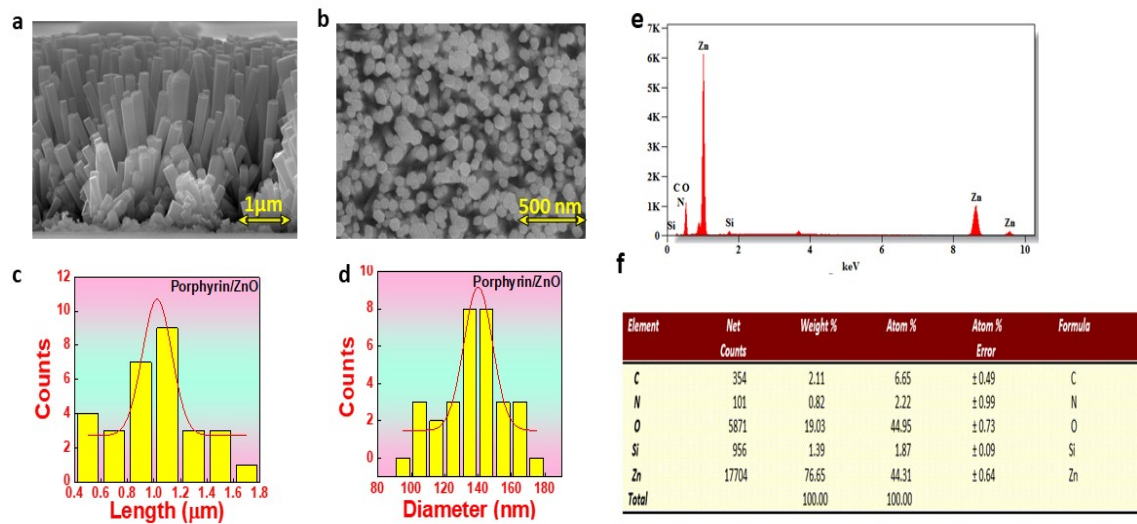

Figure S1. (a) Cross sectional view of Porphyrin/ ZnO NRs, (b) Top View of Porphyrin/ZnO NRs, (c) and (d) Length and Diameter Distribution plot of porphyrin/ ZnO NRs respectively, (e) and (f) EDAX spectrum and data of Porphyrin/ ZnO NRs.

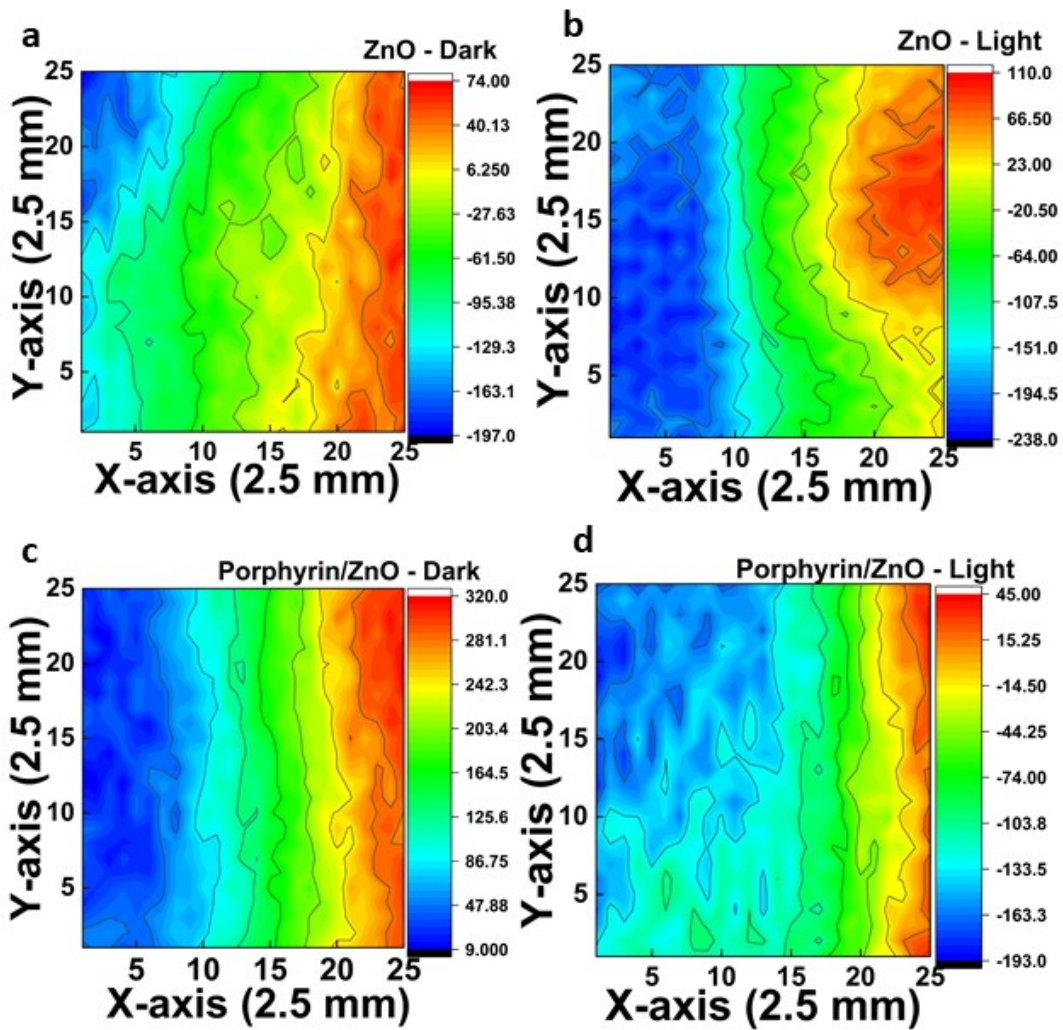

Figure S2. 2D raster scan of pure and porphyrin coated ZnO Nanorods

## 2. Concentrations calculations

$$\frac{\text{Desired concentration} \times \text{Quantity of vapor in syringe}}{\text{Volume of Chamber}} =$$

where the concentration of vapor in cylinder is given as :-

$$\text{Concentration of vapor in cylinder} = \text{Saturated Vapor Pressure of VOC} \times \frac{1000000 (= 1\text{ppm})}{1\text{atm}}$$

| Volume of VOC (Ethanol) in | Concentration of VOC in | Volume of VOC | Concentration of VOC in |
|----------------------------|-------------------------|---------------|-------------------------|
|----------------------------|-------------------------|---------------|-------------------------|

| <b>syringe (ml)</b> | <b>chamber (ppm)</b> | <b>(TEA) in syringe (ml)</b> | <b>chamber (ppm)</b> |
|---------------------|----------------------|------------------------------|----------------------|
| 1                   | 32                   | 1                            | 37                   |
| 2                   | 64                   | 2                            | 74                   |
| 3                   | 96                   | 3                            | 112                  |
| 4                   | 129                  | 4                            | 149                  |
| 5                   | 161                  | 5                            | 186                  |
| 6                   | 193                  | 6                            | 224                  |
| 7                   | 225                  | 7                            | 261                  |
| 8                   | 258                  | 8                            | 298                  |
| 9                   | 290                  | 9                            | 336                  |

**Table S1:** Dilution ratio and concentration of Ethanol and TEA vapor
